# Supplementary material for: Take 2: The maintenance of a colorectal cancer screening program in intervention clinics and roll out in usual care clinics during the second year of a pragmatic trial
Source: Research Square preprint supplement (doi:10.21203/rs.3.rs-9163243/v1), 2026-04-19
Supplement: Supplementary file 1 [file de1f8d7834a3358739a5142f.docx]

**Interview Guide: Screening More patients for CRC through Adapting and Refining Targeted Evidence-based Interventions in Rural settings (SMARTER CRC): Clinic partners exit interview**

| When | Approximately 12 months after second year list pull date, 05/13/23 and later. |
| --- | --- |
| What | Qualitative data about second year CRC implementation and sustainability of intervention at clinic level |
| Who | ORPRN Qualitative Analyst to conduct interview with key research partners and champion of project |
| Administered | PERC helps schedule meeting, PERC preps summary for qualitative researcher before meeting, qualitative researcher reviews clinic workflow and conducts interview |

Date of Interview:  
Time Conducted:  
Interviewer Name:  
Interviewee ID:

**Opening:**

**Introduction / Explanation of interview**

Thank you for participating in this interview. We are interested in learning more about your clinic’s experience with implementing the SMARTER CRC project and what your clinic is planning for the future. You have been invited to be interviewed because of your engagement with the project. These interviews are exploratory in nature with no right or wrong answers. Do you have any questions before we begin?

We are scheduled to talk for 45 to 60 minutes – Will this still work for you? We’d like to record this conversation to ensure accuracy – we’ll get the recording transcribed and remove identifiers to facilitate our analysis process. Is it OK to turn the recorder on? [If yes, start audio recording].

Are you aware you’re being recorded? [record response]

**Sections:**

**Background:**

1. First, please describe your role at [clinic], and the SMARTER CRC activities you supported?
   1. Could you please describe when and why you transitioned into the role of lead clinic representative for SMARTER CRC?

**Implementation questions:**

General Reflections

1. What were your overall impressions of the SMARTER CRC study?
   1. What do you consider the biggest successes or benefits of participating in the study?
   2. What do you consider the most challenging aspects of participating in the study?
   3. [for intervention clinics] How would you compare year one to year two?
2. Could you please describe how this program impacted your relationship with your CCO?
3. To what extent did the program help your patients?

**Mailed FIT** (See probes at end for any adaptations made)

1. How did the FIT mailing go this year?
   1. Could you describe any unanticipated successes or challenges with the mailing that came up this year? How do you think this impacted CRC screening rates, clinic staff, and patients?
   2. How did your clinic address these challenges? Can you tell me more about that? Who was involved/what decision was made/when/why?
2. To what extend would your clinic be interested in leading a FIT mailing in the future? What about participating in a CCO-lead FIT Mailing program?
   1. What kind of support would you need to participate?
   2. Would [clinic] consider doing your own mailing?

**Patient Navigation** (See probes at end for any adaptations made)

Clinics with patients to navigate:

1. Could you describe how you navigated patients with an abnormal FIT to receive a follow-up colonoscopy?
   1. Did you follow the four-topic patient navigation protocol (the one taught last summer in the training)? (*If yes*) What helped you use the four-topic protocol more consistently? (trainings, reference materials) *(If no)* Can you say a bit about what got in the way of using the four-topic protocol? What did you do instead?
   2. What worked well when navigating patients?
2. What was challenging when navigating patients?
   1. How did you address these challenges? (who was involved/what decision was made/why)
   2. What supports would have helped?
3. How was your support received by patients?
   1. Did you encounter any challenges or barriers when supporting patients? What types?
   2. Could describe one patient success story?

Clinics without patients to navigate:

1. To what extent do you foresee [clinic] integrating patient navigation in the future? (Note: This could be for CRC screening or other preventative screening services)
   1. *[If clinic foresees continued use of PN]* What systems or resources does [clinic] have in place to continue patient navigation?
   2. *[If clinic does not foresee continued use of PN]* Could you tell me more? What barriers do you anticipate? What systems or resources would [clinic] need to have in place to continue patient navigation?

**Sustainability:**

1. Could you describe how your clinic intends to support CRC screening going forward?
2. To what extent did participating in SMARTER CRC change how you approach CRC screening?
3. If [clinic] was going to implement this Mailed FIT & Patient Navigation program again, what would you do differently?
4. What advice would you give to another clinic if they were interested in implementing a Mailed FIT & Patient Navigation program
5. Could you describe how [clinic] might implement a Mailed FIT & Patient Navigation program without the support of research team members?

**ORPRN activities question:**

1. We’re interested in getting input from partners about which projects to pursue in the future. Do you have any input about which research projects ORPRN should pursue in the future? This can be about cancer or other topics.

**End of interview:**

Thank you so much for taking the time to talk with us about this today, before we end the interview did you have any questions for us? Or topics we didn’t discuss you were hoping to talk about?

*Adaptation probes:*

*For any change to intervention or implementation strategies mentioned in the interview, the interviewer should use the following probes:*

- *Can you say a bit more about the change that was made?*
- *When was the decision made to make this change?*
- *On what basis was the decision made?*
- *Who participated in the decision?*
- *What were the expected outcomes of this change?*
