# Supplementary figures and images for: Take 2: The maintenance of a colorectal cancer screening program in intervention clinics and roll out in usual care clinics during the second year of a pragmatic trial
Source: Research Square preprint supplement (doi:10.21203/rs.3.rs-9163243/v1), 2026-04-19

**
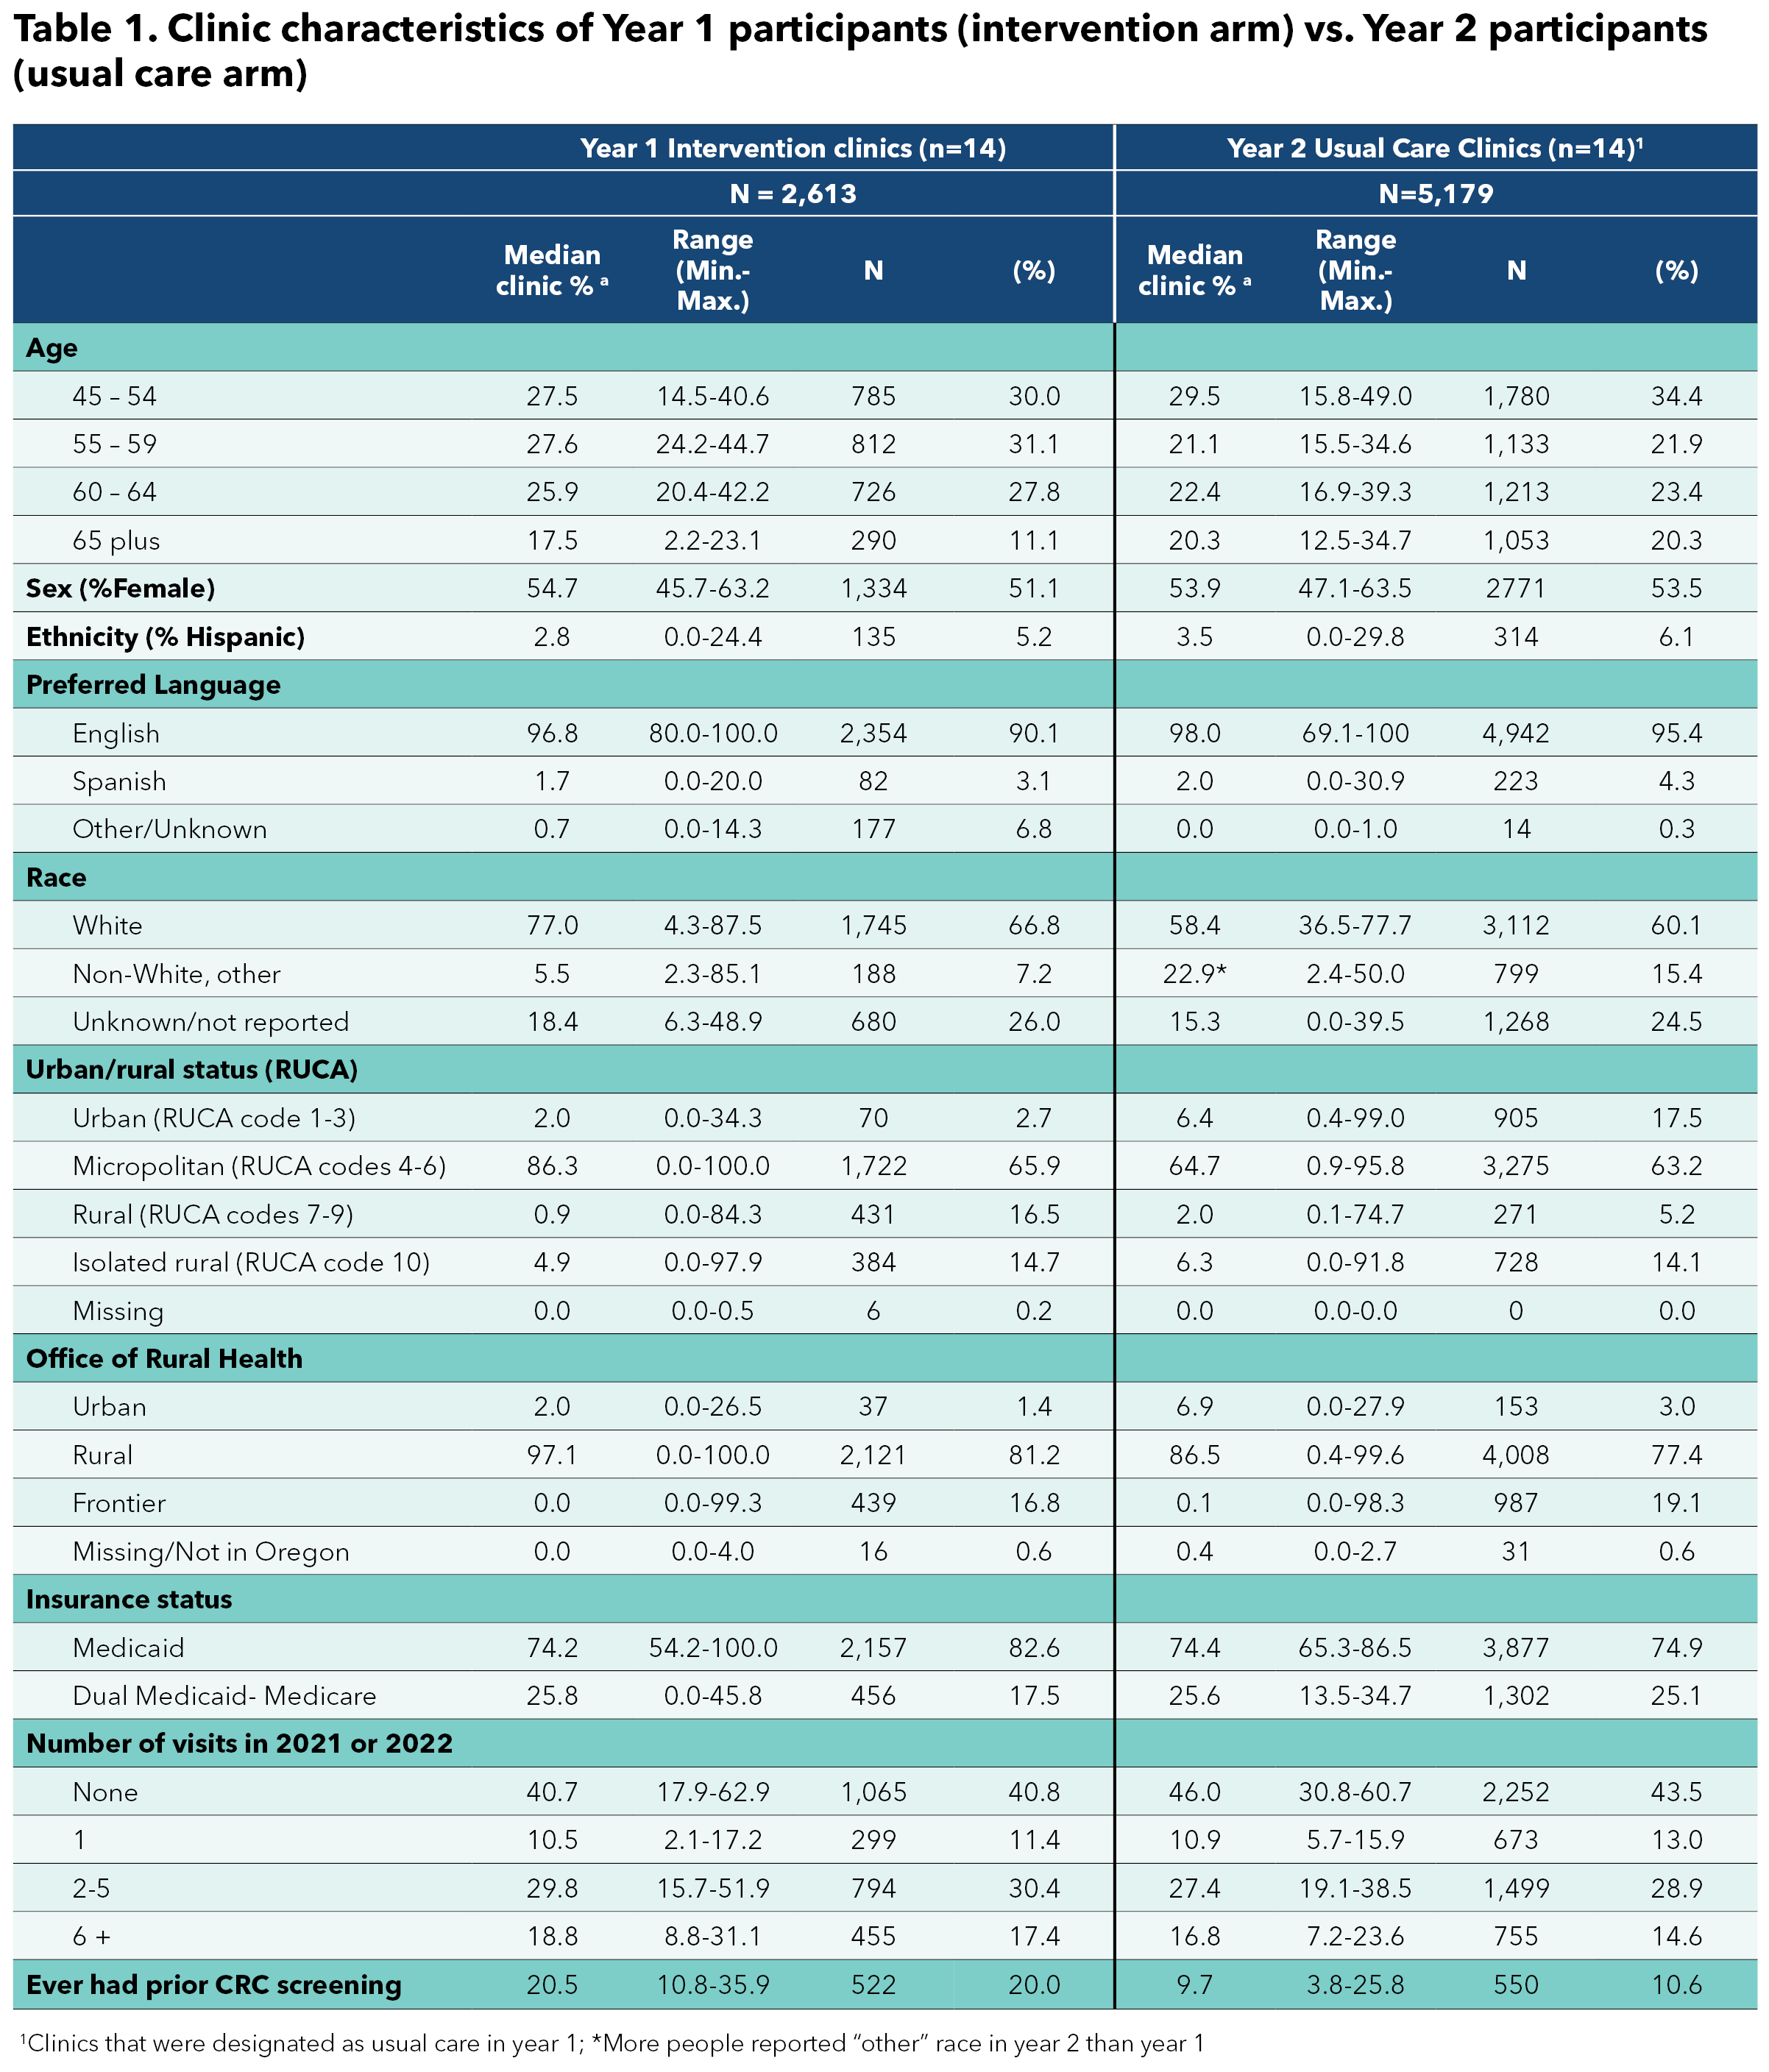
**

**
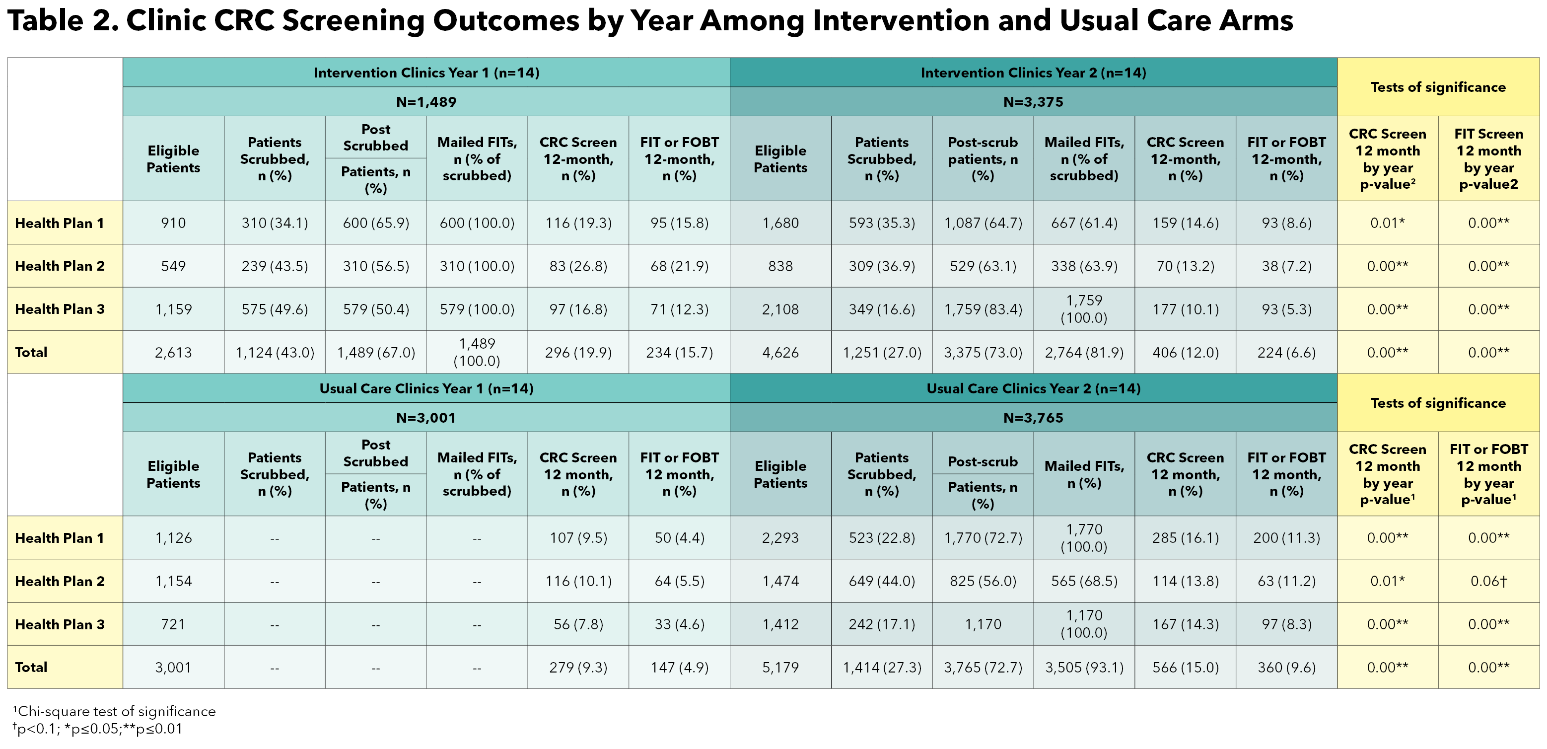
**

Supplement: Supplementary file 2 [file fdb165c845b5fe8e9f91806c.docx]
